# Supplementary material
Source: MDPI journal article supplement (https://www.mdpi.com/2227-9717/10/6/1135)
Supplement: s1 [file s1]

**Table S1.** The effects of single and combined addition of TC and Cu on seed root length

| TC (mg kg <sup>-1</sup> ) | Root length inhibition rate (%) |                               |                               |                               |
|---------------------------|---------------------------------|-------------------------------|-------------------------------|-------------------------------|
|                           | Cu (0 mg kg <sup>-1</sup> )     | Cu (100 mg kg <sup>-1</sup> ) | Cu (300 mg kg <sup>-1</sup> ) | Cu (500 mg kg <sup>-1</sup> ) |
| 0                         | 0.00                            | 23.08±0.07                    | 57.95±0.07                    | 87.18±0.03                    |
| 100                       | 30.26±0.11                      | 23.59±0.29                    | 48.72±0.04                    | 77.95±0.11                    |
| 300                       | 52.31±0.03                      | 16.41±0.27                    | 60.00±0.03                    | 74.82±0.06                    |
| 500                       | 57.44±0.10                      | 15.38±0.13                    | 52.31±0.02                    | 63.08±0.10                    |
